# Supplementary material for: MEGADOCK: An All-to-All Protein-Protein Interaction Prediction System Using Tertiary Structure Data
Source: PubMed Central journal article supplement — Protein Pept Lett. 2014 Aug;21(8):766–78. doi: 10.2174/09298665113209990050 (PMC4443796; doi:10.2174/09298665113209990050), 2014-08
Supplement: PPL-21-766_SD1.pdf [file PPL-21-766_SD1.pdf]

# **MEGADOCK: An all-to-all protein-protein interaction prediction system using tertiary structure data**

Masahito Ohue<sup>†</sup>, Yuri Matsuzaki<sup>†</sup>, Nobuyuki Uchikoga, Takashi Ishida, Yutaka Akiyama<sup>†</sup>

<sup>†</sup> {ohue, y\_matsuzaki}@bi.cs.titech.ac.jp, akiyama@cs.titech.ac.jp

**Additional tables (Table S1, S2, S3, S4, S5 and S6) and figures (Figure S1, S2 and S3) referred to in the main article.**

**Table S1. Docking prediction performance of MEGADOCK and ZDOCK for the bound docking test cases in Benchmark 4.0.** #NND denotes the number of near-native decoy in the top 3,600 predictions, Best Rank is the rank of first near-native decoy, and L-RMSD is the Ligand RMSD of first near-native decoy.

|                  | MEGADOCK 1.0 |           |        | MEGADOCK 2.0 |           |        | MEGADOCK 2.1 |           |        | ZDOCK 3.0 |           |        |
|------------------|--------------|-----------|--------|--------------|-----------|--------|--------------|-----------|--------|-----------|-----------|--------|
|                  | #NND         | Best Rank | L-RMSD | #NND         | Best Rank | L-RMSD | #NND         | Best Rank | L-RMSD | #NND      | Best Rank | L-RMSD |
| Rigid-body (121) |              |           |        |              |           |        |              |           |        |           |           |        |
| 1AHW             | 0            | -         | -      | 1            | 5         | 1.92   | 1            | 2         | 1.92   | 1         | 3         | 1.99   |
| 1BVK             | 0            | -         | -      | 4            | 250       | 4.85   | 4            | 183       | 1.75   | 3         | 91        | 2.07   |
| 1DQJ             | 0            | -         | -      | 5            | 3         | 1.99   | 6            | 4         | 1.99   | 4         | 1         | 1.51   |
| 1E6J             | 0            | -         | -      | 1            | 1258      | 1.92   | 0            | -         | -      | 2         | 170       | 2.33   |
| 1JPS             | 1            | 3517      | 4.72   | 3            | 4         | 1.99   | 3            | 4         | 1.99   | 2         | 38        | 2.41   |
| 1MLC             | 0            | -         | -      | 1            | 607       | 1.91   | 1            | 482       | 1.91   | 6         | 12        | 2.39   |
| 1VFB             | 0            | -         | -      | 2            | 107       | 1.51   | 2            | 130       | 1.59   | 1         | 77        | 1.65   |
| 1WEJ             | 0            | -         | -      | 2            | 883       | 1.55   | 3            | 872       | 1.55   | 5         | 17        | 1.57   |
| 2FD6             | 0            | -         | -      | 0            | -         | -      | 0            | -         | -      | 1         | 21        | 1.74   |
| 2I25             | 0            | -         | -      | 6            | 1         | 1.24   | 5            | 2         | 1.24   | 6         | 1         | 3.16   |
| 2VIS             | 0            | -         | -      | 0            | -         | -      | 0            | -         | -      | 2         | 252       | 3.27   |
| 1BJ1             | 0            | -         | -      | 3            | 39        | 3.15   | 3            | 69        | 2.10   | 3         | 2         | 2.70   |
| 1FSK             | 0            | -         | -      | 3            | 13        | 1.33   | 2            | 6         | 1.33   | 3         | 1         | 1.71   |
| 1I9R             | 0            | -         | -      | 0            | -         | -      | 0            | -         | -      | 1         | 514       | 3.07   |
| 1HQD             | 0            | -         | -      | 1            | 28        | 1.46   | 1            | 16        | 1.46   | 3         | 1         | 1.93   |
| 1K4C             | 0            | -         | -      | 1            | 34        | 2.16   | 2            | 10        | 2.16   | 3         | 2         | 2.25   |
| 1KXQ             | 6            | 10        | 3.01   | 5            | 8         | 1.33   | 5            | 10        | 1.33   | 5         | 1         | 1.36   |
| 1NCA             | 0            | -         | -      | 1            | 7         | 2.04   | 1            | 5         | 2.04   | 1         | 5         | 1.85   |
| 1NSN             | 3            | 719       | 4.87   | 3            | 727       | 4.33   | 3            | 291       | 1.36   | 4         | 39        | 2.16   |
| 2QFW             | 0            | -         | -      | 2            | 82        | 2.37   | 2            | 80        | 2.37   | 1         | 52        | 1.81   |
| 1QFW             | 0            | -         | -      | 1            | 214       | 3.88   | 1            | 116       | 3.88   | 1         | 375       | 3.65   |
| 2JEL             | 0            | -         | -      | 4            | 120       | 2.22   | 5            | 97        | 1.09   | 7         | 6         | 1.26   |
| 1AVX             | 0            | -         | -      | 3            | 8         | 2.56   | 3            | 7         | 2.56   | 4         | 1         | 2.47   |
| 1AY7             | 2            | 453       | 3.26   | 4            | 14        | 3.42   | 4            | 5         | 1.81   | 7         | 15        | 2.05   |
| 1BVN             | 7            | 3         | 3.70   | 10           | 1         | 4.28   | 8            | 1         | 2.93   | 15        | 1         | 1.91   |
| 1CGI             | 3            | 155       | 3.25   | 11           | 1         | 1.02   | 10           | 1         | 1.02   | 11        | 1         | 1.33   |
| 1CLV             | 24           | 1         | 2.95   | 23           | 1         | 1.99   | 25           | 1         | 1.51   | 35        | 1         | 1.78   |
| 1D6R             | 0            | -         | -      | 5            | 4         | 1.40   | 7            | 3         | 1.85   | 2         | 1597      | 1.51   |
| 1DFJ             | 2            | 10        | 3.46   | 2            | 62        | 2.21   | 2            | 19        | 2.21   | 2         | 1         | 4.10   |
| 1E6E             | 4            | 138       | 2.37   | 2            | 34        | 1.33   | 5            | 2         | 1.33   | 5         | 1         | 1.15   |
| 1EAW             | 1            | 1739      | 4.72   | 6            | 1         | 1.46   | 6            | 1         | 1.46   | 4         | 3         | 1.55   |
| 1EWY             | 6            | 798       | 4.94   | 2            | 833       | 1.03   | 1            | 607       | 1.18   | 6         | 5         | 1.71   |
| 1EZU             | 1            | 180       | 2.41   | 2            | 1         | 2.10   | 2            | 1         | 2.10   | 1         | 1         | 2.06   |
| 1F34             | 2            | 4         | 2.38   | 2            | 1         | 1.74   | 2            | 1         | 1.74   | 3         | 1         | 1.79   |
| 1FLE             | 5            | 1022      | 3.62   | 6            | 2         | 0.84   | 7            | 1         | 0.84   | 8         | 1         | 1.43   |
| 1GL1             | 12           | 31        | 2.14   | 14           | 1         | 0.99   | 14           | 1         | 0.99   | 15        | 1         | 1.38   |
| 1GXD             | 0            | -         | -      | 1            | 79        | 1.72   | 1            | 13        | 1.72   | 1         | 3         | 2.47   |
| 1HIA             | 3            | 612       | 2.69   | 10           | 1         | 1.05   | 12           | 1         | 1.23   | 10        | 3         | 1.39   |
| 1JTG             | 5            | 21        | 2.99   | 5            | 1         | 0.91   | 5            | 1         | 1.35   | 5         | 1         | 1.23   |
| 1MAH             | 6            | 187       | 1.99   | 9            | 1         | 1.52   | 9            | 1         | 1.37   | 8         | 1         | 1.52   |
| 1N8O             | 2            | 2397      | 1.90   | 3            | 1         | 2.44   | 3            | 1         | 2.44   | 2         | 1         | 2.99   |
| 1OC0             | 7            | 428       | 2.13   | 7            | 39        | 0.93   | 9            | 5         | 0.93   | 10        | 3         | 1.11   |
| 1OPH             | 0            | -         | -      | 3            | 329       | 1.53   | 4            | 212       | 1.53   | 5         | 67        | 1.42   |
| BOYV             | 0            | -         | -      | 1            | 78        | 2.37   | 1            | 1178      | 2.37   | 0         | -         | -      |
| 1OYV             | 1            | 2124      | 4.06   | 5            | 1         | 1.69   | 5            | 1         | 1.69   | 4         | 1         | 1.86   |
| 1PPE             | 7            | 61        | 3.03   | 22           | 1         | 1.43   | 22           | 1         | 1.43   | 22        | 1         | 2.39   |
| 1R0R             | 6            | 155       | 3.13   | 13           | 3         | 1.01   | 13           | 3         | 1.01   | 11        | 3         | 1.29   |
| 1TMQ             | 3            | 124       | 1.20   | 2            | 1         | 1.81   | 2            | 1         | 1.81   | 5         | 1         | 2.07   |
| 1UDI             | 8            | 1         | 1.57   | 10           | 1         | 1.31   | 11           | 1         | 1.31   | 10        | 1         | 1.18   |
| 1YVB             | 1            | 761       | 3.02   | 1            | 4         | 2.63   | 1            | 10        | 1.57   | 2         | 1         | 2.76   |
| 2ABZ             | 5            | 348       | 4.09   | 11           | 3         | 2.57   | 9            | 7         | 2.57   | 8         | 21        | 3.16   |
| 2B42             | 2            | 215       | 2.67   | 6            | 1         | 1.42   | 5            | 1         | 1.42   | 5         | 1         | 1.68   |
| 2J0T             | 0            | -         | -      | 2            | 3         | 1.58   | 1            | 7         | 1.49   | 2         | 59        | 1.43   |
| 2MTA             | 0            | -         | -      | 5            | 126       | 1.25   | 5            | 79        | 1.25   | 11        | 1         | 2.57   |
| 2O8V             | 1            | 1451      | 3.90   | 7            | 1         | 1.08   | 7            | 1         | 1.08   | 9         | 1         | 1.47   |
| 2OUL             | 1            | 736       | 3.20   | 3            | 1         | 1.24   | 3            | 1         | 1.24   | 2         | 2         | 2.05   |
| 2PCC             | 3            | 1501      | 3.45   | 0            | -         | -      | 0            | -         | -      | 2         | 31        | 1.79   |
| 2SIC             | 1            | 1720      | 3.46   | 4            | 1         | 1.85   | 4            | 2         | 1.85   | 5         | 1         | 1.98   |
| 2SNI             | 0            | -         | -      | 9            | 1         | 1.61   | 9            | 1         | 1.61   | 8         | 1         | 2.01   |
| 2UUY             | 0            | -         | -      | 8            | 1         | 1.64   | 8            | 1         | 1.64   | 9         | 5         | 2.89   |
| 3SGQ             | 8            | 83        | 3.85   | 10           | 9         | 0.78   | 7            | 7         | 3.92   | 5         | 70        | 3.51   |
| 7CEI             | 3            | 1132      | 4.00   | 7            | 1         | 1.36   | 6            | 1         | 1.36   | 5         | 2         | 4.77   |
| 1A2K             | 0            | -         | -      | 2            | 143       | 1.75   | 2            | 79        | 1.75   | 3         | 1         | 2.30   |

|      |   |      |      |    |      |      |    |      |      |    |      |      |
|------|---|------|------|----|------|------|----|------|------|----|------|------|
| 1AK4 | 0 | -    | -    | 0  | -    | -    | 0  | -    | -    | 2  | 44   | 2.20 |
| 1AKJ | 3 | 26   | 4.08 | 1  | 325  | 1.40 | 2  | 56   | 1.93 | 2  | 4    | 1.48 |
| 1AZS | 0 | -    | -    | 2  | 158  | 1.78 | 2  | 37   | 1.84 | 2  | 1    | 2.34 |
| 1B6C | 1 | 1188 | 2.81 | 2  | 2    | 1.92 | 2  | 3    | 1.92 | 1  | 1    | 1.76 |
| 1BUH | 0 | -    | -    | 5  | 27   | 1.47 | 3  | 70   | 1.47 | 7  | 5    | 2.02 |
| 1E96 | 0 | -    | -    | 0  | -    | -    | 0  | -    | -    | 1  | 1825 | 4.73 |
| 1EFN | 4 | 89   | 3.20 | 4  | 5    | 2.86 | 7  | 3    | 2.86 | 16 | 1    | 3.03 |
| 1F51 | 6 | 32   | 4.68 | 4  | 7    | 1.30 | 5  | 6    | 1.30 | 6  | 8    | 1.23 |
| 1FC2 | 0 | -    | -    | 2  | 36   | 1.71 | 2  | 41   | 1.71 | 2  | 7    | 4.15 |
| 1FCC | 0 | -    | -    | 3  | 235  | 1.32 | 2  | 324  | 1.32 | 1  | 496  | 1.29 |
| 1FFW | 4 | 623  | 4.98 | 2  | 526  | 0.89 | 3  | 123  | 0.89 | 14 | 2    | 3.29 |
| 1FQJ | 0 | -    | -    | 1  | 376  | 1.81 | 1  | 205  | 1.81 | 2  | 193  | 1.68 |
| 1GCQ | 8 | 37   | 3.01 | 9  | 1    | 1.35 | 8  | 1    | 1.35 | 9  | 3    | 1.37 |
| 1GHQ | 0 | -    | -    | 0  | -    | -    | 0  | -    | -    | 0  | -    | -    |
| 1GLA | 1 | 3311 | 1.27 | 1  | 3181 | 4.10 | 3  | 1538 | 1.95 | 8  | 14   | 2.18 |
| 1GPW | 1 | 29   | 2.20 | 4  | 1    | 1.63 | 4  | 1    | 1.63 | 3  | 2    | 1.99 |
| 1H9D | 2 | 60   | 1.95 | 4  | 1    | 3.32 | 5  | 1    | 1.64 | 5  | 1    | 2.36 |
| 1HCF | 3 | 7    | 2.20 | 2  | 8    | 1.31 | 3  | 2    | 1.31 | 4  | 5    | 1.89 |
| 1HE1 | 1 | 26   | 2.54 | 5  | 1    | 1.44 | 4  | 1    | 1.44 | 4  | 1    | 1.77 |
| 1I4D | 0 | -    | -    | 2  | 356  | 1.46 | 0  | -    | -    | 4  | 1    | 1.56 |
| 1J2J | 1 | 992  | 1.83 | 5  | 115  | 1.15 | 6  | 71   | 1.15 | 10 | 1    | 1.91 |
| 1JWH | 0 | -    | -    | 0  | -    | -    | 0  | -    | -    | 1  | 83   | 1.84 |
| 1K74 | 1 | 69   | 2.67 | 1  | 6    | 2.46 | 2  | 1    | 2.46 | 2  | 1    | 2.39 |
| 1KAC | 0 | -    | -    | 1  | 492  | 1.76 | 1  | 41   | 1.76 | 5  | 5    | 3.42 |
| 1KLU | 0 | -    | -    | 0  | -    | -    | 0  | -    | -    | 1  | 4    | 2.26 |
| 1KTZ | 0 | -    | -    | 0  | -    | -    | 2  | 221  | 1.59 | 7  | 76   | 1.62 |
| 1KXP | 1 | 1    | 1.69 | 1  | 1    | 2.51 | 1  | 1    | 2.51 | 1  | 1    | 2.14 |
| 1ML0 | 5 | 29   | 4.34 | 7  | 1    | 1.65 | 8  | 1    | 1.65 | 12 | 1    | 1.78 |
| 1OFU | 0 | -    | -    | 0  | -    | -    | 0  | -    | -    | 2  | 1    | 1.74 |
| 1PVH | 0 | -    | -    | 1  | 642  | 2.03 | 1  | 1051 | 2.03 | 2  | 75   | 1.81 |
| 1QA9 | 0 | -    | -    | 0  | -    | -    | 2  | 40   | 1.03 | 5  | 24   | 1.46 |
| 1RLB | 0 | -    | -    | 0  | -    | -    | 0  | -    | -    | 2  | 14   | 1.79 |
| 1RV6 | 5 | 141  | 2.24 | 2  | 201  | 1.72 | 3  | 140  | 1.55 | 8  | 1    | 1.72 |
| 1S1Q | 3 | 1298 | 3.43 | 3  | 538  | 0.99 | 3  | 175  | 1.08 | 3  | 54   | 1.60 |
| 1SBB | 0 | -    | -    | 1  | 2278 | 4.71 | 1  | 2245 | 2.74 | 0  | -    | -    |
| 1T6B | 0 | -    | -    | 1  | 118  | 1.66 | 1  | 49   | 1.66 | 3  | 1    | 2.66 |
| 1US7 | 0 | -    | -    | 0  | -    | -    | 0  | -    | -    | 1  | 310  | 2.81 |
| 1WDW | 1 | 3    | 2.00 | 2  | 1    | 1.49 | 2  | 1    | 1.49 | 2  | 1    | 2.53 |
| 1XD3 | 0 | -    | -    | 3  | 1    | 1.05 | 3  | 1    | 1.05 | 8  | 1    | 1.77 |
| 1XU1 | 2 | 797  | 2.47 | 10 | 1    | 0.98 | 12 | 1    | 0.98 | 16 | 3    | 3.14 |
| 1Z0K | 6 | 13   | 4.14 | 8  | 1    | 0.80 | 7  | 1    | 2.38 | 7  | 1    | 0.92 |
| 1Z5Y | 0 | -    | -    | 3  | 43   | 2.00 | 3  | 67   | 2.00 | 3  | 1    | 2.11 |
| 1ZHH | 0 | -    | -    | 2  | 7    | 1.52 | 1  | 6    | 1.52 | 3  | 1    | 2.28 |
| 1ZHI | 0 | -    | -    | 2  | 465  | 1.13 | 2  | 196  | 1.13 | 2  | 4    | 2.14 |
| 2A5T | 1 | 507  | 2.99 | 2  | 37   | 2.21 | 2  | 28   | 1.69 | 2  | 2    | 2.03 |
| 2A9K | 1 | 770  | 2.45 | 2  | 1    | 2.20 | 2  | 1    | 1.70 | 1  | 1    | 2.03 |
| 2AJF | 0 | -    | -    | 0  | -    | -    | 0  | -    | -    | 1  | 158  | 1.88 |
| 2B4J | 0 | -    | -    | 3  | 79   | 1.77 | 3  | 24   | 1.77 | 5  | 81   | 3.65 |
| 2BTF | 2 | 147  | 1.72 | 5  | 4    | 1.33 | 5  | 1    | 2.89 | 5  | 6    | 1.24 |
| 2FJU | 0 | -    | -    | 0  | -    | -    | 0  | -    | -    | 2  | 3    | 1.39 |
| 2G77 | 4 | 42   | 2.81 | 5  | 1    | 1.85 | 5  | 1    | 1.43 | 4  | 1    | 2.18 |
| 2HLE | 0 | -    | -    | 4  | 3    | 1.81 | 4  | 2    | 1.81 | 4  | 2    | 1.86 |
| 2HQS | 4 | 11   | 1.86 | 3  | 4    | 1.09 | 5  | 2    | 1.09 | 3  | 3    | 1.71 |
| 2OOB | 0 | -    | -    | 0  | -    | -    | 0  | -    | -    | 0  | -    | -    |
| 2OOR | 2 | 718  | 2.01 | 3  | 1    | 1.73 | 3  | 1    | 2.20 | 4  | 1    | 1.68 |
| 2VDB | 0 | -    | -    | 7  | 3    | 1.02 | 7  | 2    | 1.02 | 10 | 1    | 3.37 |
| 3BP8 | 0 | -    | -    | 2  | 952  | 0.99 | 1  | 1562 | 4.00 | 3  | 429  | 3.10 |
| 3D5S | 1 | 202  | 3.07 | 3  | 6    | 0.88 | 4  | 6    | 0.88 | 4  | 5    | 1.28 |

Medium Difficulty (30)

|      |   |      |      |    |      |      |    |     |      |    |     |      |
|------|---|------|------|----|------|------|----|-----|------|----|-----|------|
| 1BGX | 1 | 1    | 4.72 | 1  | 1    | 2.97 | 1  | 1   | 2.97 | 1  | 1   | 3.10 |
| 1ACB | 2 | 1664 | 4.53 | 5  | 2    | 1.49 | 5  | 9   | 1.49 | 12 | 2   | 4.52 |
| 1IJK | 1 | 400  | 1.94 | 1  | 1463 | 2.20 | 1  | 63  | 1.84 | 2  | 1   | 1.79 |
| 1JIW | 0 | -    | -    | 3  | 10   | 1.22 | 3  | 6   | 0.88 | 4  | 1   | 1.28 |
| 1KKL | 2 | 222  | 2.66 | 1  | 733  | 4.05 | 1  | 404 | 4.05 | 6  | 510 | 3.54 |
| 1M10 | 1 | 205  | 3.07 | 1  | 32   | 2.93 | 1  | 1   | 2.93 | 2  | 1   | 3.40 |
| 1NW9 | 6 | 7    | 1.82 | 6  | 1    | 1.43 | 6  | 1   | 1.22 | 7  | 1   | 2.07 |
| 4CPA | 2 | 2301 | 3.67 | 16 | 6    | 2.95 | 14 | 5   | 2.95 | 21 | 2   | 4.10 |
| 1GP2 | 0 | -    | -    | 1  | 167  | 2.30 | 1  | 12  | 2.30 | 2  | 1   | 2.22 |
| 1GRN | 0 | -    | -    | 4  | 1    | 1.42 | 4  | 1   | 1.42 | 3  | 1   | 1.74 |
| 1HE8 | 0 | -    | -    | 0  | -    | -    | 0  | -   | -    | 1  | 421 | 4.29 |
| 1I2M | 2 | 1    | 2.46 | 2  | 1    | 1.69 | 1  | 1   | 1.69 | 1  | 1   | 1.73 |
| 1IB1 | 1 | 43   | 2.33 | 1  | 18   | 3.02 | 2  | 9   | 3.02 | 2  | 40  | 1.62 |
| 1K5D | 1 | 455  | 2.34 | 1  | 5    | 1.69 | 1  | 1   | 1.69 | 2  | 1   | 1.73 |

|                |   |      |      |   |      |      |    |      |      |   |     |      |
|----------------|---|------|------|---|------|------|----|------|------|---|-----|------|
| 1LFD           | 1 | 446  | 1.91 | 3 | 24   | 1.32 | 5  | 3    | 1.32 | 5 | 5   | 1.10 |
| 1MQ8           | 0 | -    | -    | 3 | 1144 | 4.94 | 2  | 1216 | 1.97 | 2 | 261 | 2.27 |
| 1N2C           | 1 | 24   | 2.26 | 2 | 1    | 2.17 | 2  | 2    | 2.17 | 2 | 1   | 2.08 |
| 1R6Q           | 4 | 679  | 1.97 | 4 | 16   | 1.40 | 4  | 7    | 1.40 | 3 | 66  | 1.39 |
| 1SYX           | 2 | 290  | 2.77 | 4 | 146  | 1.55 | 6  | 5    | 1.55 | 5 | 435 | 3.38 |
| 1WQ1           | 3 | 5    | 1.94 | 5 | 1    | 1.04 | 4  | 1    | 1.04 | 3 | 1   | 1.82 |
| 1XQS           | 0 | -    | -    | 1 | 1    | 1.81 | 2  | 1    | 1.81 | 1 | 1   | 1.79 |
| 2AYO           | 0 | -    | -    | 9 | 1    | 1.48 | 10 | 1    | 1.48 | 7 | 1   | 2.15 |
| 2CFH           | 4 | 32   | 2.71 | 5 | 1    | 1.28 | 5  | 1    | 1.28 | 6 | 1   | 1.57 |
| 2H7V           | 0 | -    | -    | 1 | 500  | 1.56 | 1  | 309  | 1.56 | 2 | 1   | 2.29 |
| 2HRK           | 4 | 318  | 1.94 | 4 | 15   | 1.17 | 3  | 8    | 1.17 | 5 | 5   | 2.54 |
| 2J7P           | 1 | 1    | 2.59 | 2 | 1    | 1.67 | 2  | 1    | 1.67 | 1 | 1   | 1.49 |
| 2NZ8           | 4 | 106  | 4.75 | 3 | 16   | 1.81 | 3  | 12   | 1.81 | 3 | 1   | 1.82 |
| 2OZA           | 1 | 2    | 3.49 | 1 | 1    | 1.66 | 1  | 1    | 1.66 | 1 | 1   | 1.98 |
| 2Z0E           | 2 | 110  | 3.11 | 2 | 1    | 1.16 | 2  | 1    | 2.12 | 3 | 1   | 1.55 |
| 3CPH           | 0 | -    | -    | 1 | 418  | 1.74 | 2  | 160  | 1.74 | 3 | 1   | 2.06 |
| Difficult (25) |   |      |      |   |      |      |    |      |      |   |     |      |
| 1E4K           | 0 | -    | -    | 1 | 1000 | 1.91 | 1  | 552  | 1.91 | 1 | 688 | 2.55 |
| 2HMI           | 0 | -    | -    | 0 | -    | -    | 0  | -    | -    | 1 | 10  | 4.53 |
| 1F6M           | 2 | 456  | 2.55 | 5 | 18   | 1.02 | 7  | 15   | 4.07 | 8 | 1   | 2.16 |
| 1FQ1           | 1 | 612  | 2.54 | 1 | 253  | 1.58 | 1  | 48   | 1.58 | 1 | 11  | 1.98 |
| 1PXV           | 2 | 298  | 2.08 | 5 | 1    | 1.01 | 4  | 1    | 1.01 | 6 | 1   | 2.05 |
| 1ZLI           | 3 | 5    | 4.02 | 6 | 1    | 1.35 | 6  | 1    | 1.35 | 6 | 1   | 4.29 |
| 2O3B           | 2 | 38   | 2.49 | 2 | 142  | 1.27 | 2  | 22   | 1.29 | 2 | 1   | 1.41 |
| 1ATN           | 0 | -    | -    | 2 | 154  | 1.57 | 2  | 175  | 3.86 | 2 | 1   | 1.59 |
| 1BKD           | 3 | 1    | 2.08 | 5 | 1    | 1.99 | 5  | 1    | 1.99 | 4 | 1   | 1.94 |
| 1DE4           | 0 | -    | -    | 1 | 359  | 2.89 | 1  | 426  | 2.89 | 1 | 1   | 3.61 |
| 1EER           | 1 | 274  | 3.87 | 1 | 1    | 2.54 | 1  | 1    | 2.54 | 1 | 1   | 2.70 |
| 1FAK           | 2 | 42   | 2.76 | 4 | 1    | 1.95 | 4  | 1    | 1.95 | 3 | 1   | 1.95 |
| 1H1V           | 0 | -    | -    | 1 | 514  | 2.05 | 0  | -    | -    | 0 | -   | -    |
| 1IBR           | 1 | 8    | 3.32 | 1 | 3    | 2.50 | 1  | 1    | 2.09 | 1 | 1   | 2.13 |
| 1IRA           | 5 | 8    | 2.34 | 5 | 1    | 1.09 | 5  | 1    | 1.09 | 3 | 1   | 1.50 |
| 1JK9           | 2 | 1380 | 2.27 | 3 | 1    | 1.13 | 3  | 6    | 1.13 | 4 | 1   | 1.41 |
| 1JMO           | 2 | 892  | 2.41 | 3 | 1    | 1.34 | 3  | 1    | 1.34 | 3 | 1   | 1.71 |
| 1JZD           | 1 | 1368 | 1.97 | 1 | 32   | 1.24 | 2  | 19   | 1.42 | 4 | 1   | 1.98 |
| 1R8S           | 1 | 1    | 1.98 | 4 | 1    | 1.47 | 4  | 1    | 1.47 | 5 | 1   | 1.81 |
| 1Y64           | 1 | 911  | 1.61 | 1 | 64   | 1.83 | 1  | 9    | 1.83 | 1 | 114 | 2.28 |
| 1ZM4           | 0 | -    | -    | 1 | 1022 | 4.60 | 1  | 539  | 4.60 | 1 | 11  | 1.54 |
| 2C0L           | 1 | 1800 | 3.13 | 2 | 2    | 1.88 | 2  | 1    | 1.88 | 2 | 1   | 1.51 |
| 2I9B           | 1 | 973  | 1.80 | 2 | 2    | 1.60 | 3  | 1    | 1.60 | 3 | 1   | 1.83 |
| 2IDO           | 4 | 102  | 1.86 | 7 | 1    | 1.70 | 7  | 1    | 1.70 | 7 | 1   | 1.60 |
| 2OT3           | 1 | 498  | 2.60 | 4 | 1    | 2.03 | 4  | 1    | 1.84 | 5 | 1   | 1.31 |

**Table S2. Docking prediction performance of MEGADOCK and ZDOCK for the unbound docking test cases in Benchmark 4.0.** #NND denotes the number of near-native decoy in the top 3,600 predictions, Best Rank is the rank of first near-native decoy, and L-RMSD is the Ligand RMSD of first near-native decoy.

|                  | MEGADOCK 1.0 |           |        | MEGADOCK 2.0 |           |        | MEGADOCK 2.1 |           |        | ZDOCK 3.0 |           |        |
|------------------|--------------|-----------|--------|--------------|-----------|--------|--------------|-----------|--------|-----------|-----------|--------|
|                  | #NND         | Best Rank | L-RMSD | #NND         | Best Rank | L-RMSD | #NND         | Best Rank | L-RMSD | #NND      | Best Rank | L-RMSD |
| Rigid-body (121) |              |           |        |              |           |        |              |           |        |           |           |        |
| 1AHW             | 0            | -         | -      | 1            | 526       | 3.29   | 1            | 1490      | 2.99   | 1         | 1621      | 2.52   |
| 1BVK             | 0            | -         | -      | 1            | 3510      | 4.69   | 0            | -         | -      | 3         | 321       | 4.32   |
| 1DQJ             | 0            | -         | -      | 0            | -         | -      | 0            | -         | -      | 0         | -         | -      |
| 1E6J             | 0            | -         | -      | 2            | 2146      | 4.15   | 1            | 2574      | 4.15   | 2         | 124       | 4.24   |
| 1JPS             | 1            | 3152      | 4.15   | 1            | 681       | 2.78   | 2            | 571       | 2.78   | 1         | 1171      | 3.53   |
| 1MLC             | 0            | -         | -      | 0            | -         | -      | 0            | -         | -      | 4         | 56        | 3.54   |
| 1VFB             | 0            | -         | -      | 1            | 3162      | 4.57   | 0            | -         | -      | 1         | 1905      | 4.93   |
| 1WEJ             | 0            | -         | -      | 1            | 2887      | 4.44   | 2            | 2980      | 4.12   | 6         | 155       | 1.88   |
| 2FD6             | 0            | -         | -      | 0            | -         | -      | 0            | -         | -      | 0         | -         | -      |
| 2I25             | 0            | -         | -      | 0            | -         | -      | 0            | -         | -      | 6         | 9         | 1.82   |
| 2VIS             | 0            | -         | -      | 0            | -         | -      | 0            | -         | -      | 0         | -         | -      |
| 1BJ1             | 0            | -         | -      | 1            | 222       | 4.67   | 1            | 785       | 4.11   | 3         | 1         | 4.29   |
| 1FSK             | 0            | -         | -      | 4            | 27        | 1.83   | 4            | 12        | 1.83   | 4         | 1         | 2.12   |
| 1I9R             | 0            | -         | -      | 0            | -         | -      | 0            | -         | -      | 0         | -         | -      |
| 1IQD             | 0            | -         | -      | 1            | 2348      | 4.38   | 1            | 1998      | 4.72   | 2         | 50        | 4.48   |
| 1K4C             | 0            | -         | -      | 0            | -         | -      | 0            | -         | -      | 2         | 2087      | 1.91   |
| 1KXQ             | 3            | 200       | 3.91   | 3            | 101       | 4.79   | 2            | 115       | 4.79   | 1         | 1         | 1.37   |
| 1NCA             | 0            | -         | -      | 1            | 68        | 2.73   | 1            | 106       | 2.73   | 1         | 188       | 1.97   |
| 1NSN             | 2            | 1409      | 4.53   | 0            | -         | -      | 0            | -         | -      | 0         | -         | -      |
| 2QFW             | 0            | -         | -      | 1            | 636       | 3.49   | 1            | 543       | 3.49   | 1         | 49        | 4.34   |
| 1QFW             | 0            | -         | -      | 0            | -         | -      | 0            | -         | -      | 1         | 291       | 3.26   |
| 2JEL             | 0            | -         | -      | 2            | 2156      | 3.33   | 1            | 1957      | 3.74   | 10        | 118       | 4.38   |
| 1AVX             | 0            | -         | -      | 1            | 471       | 4.25   | 1            | 686       | 4.25   | 1         | 235       | 3.16   |
| 1AY7             | 4            | 1233      | 3.69   | 4            | 1252      | 3.86   | 3            | 1225      | 4.43   | 3         | 1525      | 4.96   |
| 1BVN             | 4            | 5         | 4.25   | 8            | 42        | 4.68   | 8            | 11        | 4.08   | 8         | 2         | 4.28   |
| 1CGI             | 1            | 1019      | 4.77   | 1            | 107       | 4.29   | 1            | 96        | 4.29   | 6         | 154       | 4.86   |
| 1CLV             | 1            | 157       | 4.35   | 3            | 188       | 4.74   | 4            | 99        | 4.74   | 16        | 1         | 3.22   |
| 1D6R             | 0            | -         | -      | 2            | 1492      | 4.26   | 2            | 1409      | 4.26   | 0         | -         | -      |
| 1DFJ             | 2            | 32        | 4.07   | 1            | 17        | 2.69   | 1            | 3         | 2.69   | 1         | 2         | 2.83   |
| 1E6E             | 2            | 1600      | 2.98   | 1            | 2822      | 4.98   | 3            | 1202      | 2.99   | 7         | 16        | 3.16   |
| 1EAW             | 1            | 2586      | 4.85   | 7            | 24        | 3.36   | 6            | 42        | 4.13   | 7         | 45        | 4.64   |
| 1EWY             | 7            | 631       | 4.69   | 1            | 1896      | 3.69   | 3            | 259       | 4.96   | 6         | 10        | 4.78   |
| 1EZU             | 0            | -         | -      | 1            | 1405      | 3.53   | 1            | 2759      | 3.53   | 1         | 2498      | 3.02   |
| 1F34             | 2            | 488       | 2.80   | 1            | 515       | 2.00   | 1            | 128       | 2.55   | 1         | 702       | 3.12   |
| 1FLE             | 0            | -         | -      | 0            | -         | -      | 0            | -         | -      | 0         | -         | -      |
| 1GL1             | 0            | -         | -      | 6            | 562       | 4.72   | 2            | 1109      | 4.72   | 3         | 256       | 3.69   |
| 1GXD             | 0            | -         | -      | 0            | -         | -      | 0            | -         | -      | 0         | -         | -      |
| 1HIA             | 0            | -         | -      | 0            | -         | -      | 0            | -         | -      | 0         | -         | -      |
| 1JTG             | 4            | 2         | 3.87   | 4            | 3         | 2.65   | 4            | 2         | 3.32   | 4         | 1         | 3.39   |
| 1MAH             | 0            | -         | -      | 6            | 69        | 2.22   | 5            | 35        | 4.04   | 7         | 1         | 3.97   |
| 1N8O             | 0            | -         | -      | 1            | 132       | 2.67   | 1            | 215       | 2.67   | 2         | 4         | 2.86   |
| 1OC0             | 0            | -         | -      | 0            | -         | -      | 0            | -         | -      | 0         | -         | -      |
| 1OPH             | 0            | -         | -      | 0            | -         | -      | 0            | -         | -      | 0         | -         | -      |
| BOYV             | 0            | -         | -      | 0            | -         | -      | 0            | -         | -      | 0         | -         | -      |
| 1OYV             | 2            | 936       | 4.67   | 3            | 79        | 3.92   | 3            | 128       | 4.15   | 2         | 157       | 4.39   |
| 1PPE             | 5            | 178       | 3.88   | 15           | 1         | 3.08   | 16           | 1         | 3.08   | 16        | 1         | 2.66   |
| 1R0R             | 4            | 935       | 3.78   | 7            | 148       | 2.74   | 7            | 199       | 2.74   | 6         | 605       | 2.42   |
| 1TMQ             | 1            | 89        | 2.32   | 3            | 104       | 2.30   | 1            | 1028      | 2.44   | 4         | 12        | 4.89   |
| 1UDI             | 2            | 1485      | 4.32   | 3            | 64        | 4.37   | 3            | 8         | 4.37   | 3         | 67        | 3.93   |
| 1YVB             | 0            | -         | -      | 1            | 163       | 3.94   | 1            | 180       | 4.47   | 0         | -         | -      |
| 2ABZ             | 1            | 801       | 4.49   | 0            | -         | -      | 1            | 1482      | 4.78   | 0         | -         | -      |
| 2B42             | 0            | -         | -      | 1            | 133       | 2.40   | 1            | 120       | 2.40   | 3         | 1         | 1.83   |
| 2J0T             | 0            | -         | -      | 0            | -         | -      | 1            | 929       | 4.91   | 0         | -         | -      |
| 2MTA             | 0            | -         | -      | 1            | 3384      | 1.84   | 1            | 3561      | 1.84   | 7         | 214       | 4.65   |
| 2O8V             | 0            | -         | -      | 0            | -         | -      | 0            | -         | -      | 0         | -         | -      |
| 2OUL             | 1            | 1246      | 2.48   | 2            | 1         | 1.92   | 3            | 1         | 1.92   | 3         | 1         | 2.26   |
| 2PCC             | 0            | -         | -      | 0            | -         | -      | 0            | -         | -      | 0         | -         | -      |
| 2SIC             | 0            | -         | -      | 1            | 844       | 3.08   | 1            | 1328      | 3.08   | 2         | 2         | 2.38   |
| 2SNI             | 0            | -         | -      | 0            | -         | -      | 0            | -         | -      | 3         | 1464      | 3.63   |
| 2UUY             | 0            | -         | -      | 1            | 1597      | 4.40   | 1            | 1484      | 4.40   | 1         | 3127      | 4.61   |
| 3SGQ             | 0            | -         | -      | 3            | 28        | 4.08   | 3            | 38        | 4.08   | 3         | 792       | 2.11   |
| 7CEI             | 0            | -         | -      | 2            | 374       | 3.77   | 2            | 38        | 2.84   | 2         | 23        | 3.94   |
| 1A2K             | 0            | -         | -      | 0            | -         | -      | 0            | -         | -      | 1         | 2973      | 4.56   |

|      |   |      |      |   |      |      |   |      |      |   |      |      |
|------|---|------|------|---|------|------|---|------|------|---|------|------|
| 1AK4 | 0 | -    | -    | 0 | -    | -    | 0 | -    | -    | 0 | -    | -    |
| 1AKJ | 2 | 305  | 4.83 | 0 | -    | -    | 0 | -    | -    | 1 | 1455 | 3.33 |
| 1AZS | 0 | -    | -    | 0 | -    | -    | 0 | -    | -    | 1 | 98   | 2.55 |
| 1B6C | 0 | -    | -    | 1 | 740  | 3.33 | 1 | 885  | 3.33 | 1 | 24   | 3.18 |
| 1BUH | 0 | -    | -    | 0 | -    | -    | 0 | -    | -    | 8 | 47   | 4.65 |
| 1E96 | 0 | -    | -    | 0 | -    | -    | 0 | -    | -    | 0 | -    | -    |
| 1EFN | 0 | -    | -    | 0 | -    | -    | 0 | -    | -    | 0 | -    | -    |
| 1F51 | 2 | 2253 | 4.56 | 1 | 345  | 4.38 | 1 | 318  | 4.38 | 1 | 1516 | 3.06 |
| 1FC2 | 0 | -    | -    | 0 | -    | -    | 0 | -    | -    | 0 | -    | -    |
| 1FCC | 0 | -    | -    | 0 | -    | -    | 0 | -    | -    | 0 | -    | -    |
| 1FFW | 0 | -    | -    | 0 | -    | -    | 0 | -    | -    | 2 | 77   | 4.85 |
| 1FQJ | 0 | -    | -    | 0 | -    | -    | 0 | -    | -    | 0 | -    | -    |
| 1GCQ | 0 | -    | -    | 0 | -    | -    | 0 | -    | -    | 0 | -    | -    |
| 1GHQ | 0 | -    | -    | 0 | -    | -    | 0 | -    | -    | 0 | -    | -    |
| 1GLA | 0 | -    | -    | 0 | -    | -    | 0 | -    | -    | 0 | -    | -    |
| 1GPW | 4 | 12   | 2.49 | 2 | 16   | 2.25 | 3 | 16   | 4.23 | 1 | 87   | 2.40 |
| 1H9D | 1 | 1424 | 4.94 | 3 | 132  | 4.07 | 2 | 474  | 4.07 | 2 | 364  | 4.58 |
| 1HCF | 0 | -    | -    | 0 | -    | -    | 0 | -    | -    | 3 | 90   | 4.28 |
| 1HE1 | 1 | 48   | 3.76 | 1 | 385  | 4.09 | 1 | 595  | 4.09 | 0 | -    | -    |
| 1I4D | 0 | -    | -    | 0 | -    | -    | 0 | -    | -    | 1 | 1020 | 4.85 |
| 1J2J | 0 | -    | -    | 0 | -    | -    | 0 | -    | -    | 0 | -    | -    |
| 1JWH | 0 | -    | -    | 0 | -    | -    | 0 | -    | -    | 2 | 171  | 2.48 |
| 1K74 | 1 | 8    | 4.35 | 1 | 403  | 3.80 | 1 | 9    | 4.49 | 1 | 5    | 3.49 |
| 1KAC | 1 | 805  | 4.63 | 1 | 2487 | 4.14 | 2 | 1351 | 4.27 | 1 | 1801 | 4.26 |
| 1KLU | 0 | -    | -    | 0 | -    | -    | 0 | -    | -    | 0 | -    | -    |
| 1KTZ | 0 | -    | -    | 0 | -    | -    | 0 | -    | -    | 0 | -    | -    |
| 1KXP | 1 | 7    | 3.04 | 0 | -    | -    | 1 | 18   | 3.12 | 2 | 1    | 3.63 |
| 1ML0 | 3 | 529  | 4.17 | 3 | 70   | 3.85 | 4 | 45   | 3.85 | 6 | 35   | 3.59 |
| 1OFU | 0 | -    | -    | 0 | -    | -    | 0 | -    | -    | 1 | 39   | 2.41 |
| 1PVH | 0 | -    | -    | 0 | -    | -    | 0 | -    | -    | 3 | 1528 | 4.70 |
| 1QA9 | 0 | -    | -    | 0 | -    | -    | 0 | -    | -    | 0 | -    | -    |
| 1RLB | 0 | -    | -    | 0 | -    | -    | 0 | -    | -    | 0 | -    | -    |
| 1RV6 | 2 | 3038 | 2.34 | 1 | 1642 | 2.24 | 1 | 2378 | 2.19 | 3 | 1    | 2.45 |
| 1S1Q | 3 | 693  | 4.25 | 3 | 580  | 4.85 | 3 | 1167 | 2.62 | 4 | 494  | 4.48 |
| 1SBB | 0 | -    | -    | 0 | -    | -    | 0 | -    | -    | 0 | -    | -    |
| 1T6B | 0 | -    | -    | 0 | -    | -    | 0 | -    | -    | 1 | 234  | 3.16 |
| 1US7 | 0 | -    | -    | 0 | -    | -    | 0 | -    | -    | 2 | 849  | 4.24 |
| 1WDW | 1 | 299  | 3.17 | 1 | 8    | 2.15 | 1 | 9    | 2.15 | 2 | 4    | 2.87 |
| 1XD3 | 0 | -    | -    | 0 | -    | -    | 0 | -    | -    | 8 | 5    | 4.85 |
| 1XU1 | 0 | -    | -    | 0 | -    | -    | 0 | -    | -    | 0 | -    | -    |
| 1Z0K | 0 | -    | -    | 0 | -    | -    | 1 | 837  | 4.87 | 0 | -    | -    |
| 1Z5Y | 0 | -    | -    | 0 | -    | -    | 0 | -    | -    | 3 | 104  | 4.99 |
| 1ZHH | 0 | -    | -    | 0 | -    | -    | 0 | -    | -    | 0 | -    | -    |
| 1ZHI | 0 | -    | -    | 0 | -    | -    | 0 | -    | -    | 2 | 87   | 4.47 |
| 2A5T | 0 | -    | -    | 0 | -    | -    | 0 | -    | -    | 0 | -    | -    |
| 2A9K | 0 | -    | -    | 0 | -    | -    | 0 | -    | -    | 0 | -    | -    |
| 2AJF | 0 | -    | -    | 0 | -    | -    | 0 | -    | -    | 0 | -    | -    |
| 2B4J | 0 | -    | -    | 0 | -    | -    | 0 | -    | -    | 0 | -    | -    |
| 2BTF | 1 | 2945 | 4.55 | 0 | -    | -    | 0 | -    | -    | 4 | 179  | 3.93 |
| 2FJU | 0 | -    | -    | 0 | -    | -    | 0 | -    | -    | 1 | 1381 | 4.84 |
| 2G77 | 0 | -    | -    | 0 | -    | -    | 1 | 131  | 4.86 | 5 | 23   | 3.83 |
| 2HLE | 1 | 347  | 4.22 | 2 | 501  | 4.53 | 2 | 367  | 4.62 | 2 | 225  | 4.17 |
| 2HQS | 2 | 1702 | 3.37 | 0 | -    | -    | 1 | 2740 | 4.95 | 0 | -    | -    |
| 2OOB | 0 | -    | -    | 0 | -    | -    | 0 | -    | -    | 0 | -    | -    |
| 2OOR | 0 | -    | -    | 0 | -    | -    | 0 | -    | -    | 1 | 898  | 4.55 |
| 2VDB | 0 | -    | -    | 5 | 197  | 4.54 | 5 | 51   | 4.17 | 4 | 15   | 1.74 |
| 3BP8 | 0 | -    | -    | 0 | -    | -    | 0 | -    | -    | 0 | -    | -    |
| 3D5S | 0 | -    | -    | 1 | 254  | 3.65 | 3 | 82   | 3.65 | 4 | 60   | 2.12 |

Medium Difficulty (30)

|      |   |      |      |   |     |      |   |      |      |    |      |      |
|------|---|------|------|---|-----|------|---|------|------|----|------|------|
| 1BGX | 0 | -    | -    | 0 | -   | -    | 0 | -    | -    | 0  | -    | -    |
| 1ACB | 1 | 2306 | 4.85 | 0 | -   | -    | 1 | 2567 | 4.61 | 4  | 212  | 4.78 |
| 1IJK | 0 | -    | -    | 0 | -   | -    | 0 | -    | -    | 1  | 505  | 2.33 |
| 1JIW | 0 | -    | -    | 0 | -   | -    | 0 | -    | -    | 0  | -    | -    |
| 1KKL | 0 | -    | -    | 0 | -   | -    | 0 | -    | -    | 0  | -    | -    |
| 1M10 | 0 | -    | -    | 0 | -   | -    | 0 | -    | -    | 0  | -    | -    |
| 1NW9 | 0 | -    | -    | 0 | -   | -    | 2 | 2455 | 4.96 | 0  | -    | -    |
| 4CPA | 0 | -    | -    | 9 | 2   | 4.66 | 8 | 4    | 4.03 | 16 | 1    | 3.55 |
| 1GP2 | 0 | -    | -    | 0 | -   | -    | 0 | -    | -    | 0  | -    | -    |
| 1GRN | 0 | -    | -    | 1 | 663 | 3.05 | 0 | -    | -    | 1  | 2585 | 4.56 |
| 1HE8 | 0 | -    | -    | 0 | -   | -    | 0 | -    | -    | 0  | -    | -    |
| 1I2M | 0 | -    | -    | 0 | -   | -    | 0 | -    | -    | 1  | 46   | 2.57 |
| 1IB1 | 0 | -    | -    | 0 | -   | -    | 0 | -    | -    | 0  | -    | -    |
| 1K5D | 0 | -    | -    | 0 | -   | -    | 0 | -    | -    | 0  | -    | -    |

|                |   |      |      |   |     |      |   |      |      |   |      |      |
|----------------|---|------|------|---|-----|------|---|------|------|---|------|------|
| 1LFD           | 0 | -    | -    | 0 | -   | -    | 1 | 1653 | 4.79 | 0 | -    | -    |
| 1MQ8           | 0 | -    | -    | 0 | -   | -    | 0 | -    | -    | 0 | -    | -    |
| 1N2C           | 0 | -    | -    | 0 | -   | -    | 0 | -    | -    | 0 | -    | -    |
| 1R6Q           | 0 | -    | -    | 0 | -   | -    | 1 | 1297 | 3.57 | 0 | -    | -    |
| 1SYX           | 1 | 14   | 4.93 | 0 | -   | -    | 1 | 67   | 4.87 | 1 | 20   | 4.91 |
| 1WQ1           | 0 | -    | -    | 0 | -   | -    | 0 | -    | -    | 1 | 1683 | 4.34 |
| 1XQS           | 0 | -    | -    | 0 | -   | -    | 1 | 576  | 3.75 | 1 | 80   | 4.46 |
| 2AYO           | 3 | 1234 | 4.66 | 1 | 877 | 3.40 | 3 | 237  | 3.40 | 6 | 62   | 4.72 |
| 2CFH           | 1 | 42   | 4.80 | 2 | 66  | 4.98 | 2 | 20   | 4.98 | 2 | 6    | 4.74 |
| 2H7V           | 0 | -    | -    | 0 | -   | -    | 0 | -    | -    | 0 | -    | -    |
| 2HRK           | 3 | 2678 | 3.95 | 0 | -   | -    | 0 | -    | -    | 1 | 825  | 4.92 |
| 2J7P           | 0 | -    | -    | 0 | -   | -    | 0 | -    | -    | 0 | -    | -    |
| 2NZ8           | 0 | -    | -    | 0 | -   | -    | 0 | -    | -    | 0 | -    | -    |
| 2OZA           | 1 | 1685 | 4.88 | 0 | -   | -    | 0 | -    | -    | 0 | -    | -    |
| 2ZOE           | 0 | -    | -    | 0 | -   | -    | 0 | -    | -    | 1 | 1688 | 4.81 |
| 3CPH           | 0 | -    | -    | 0 | -   | -    | 0 | -    | -    | 0 | -    | -    |
| Difficult (25) |   |      |      |   |     |      |   |      |      |   |      |      |
| 1E4K           | 0 | -    | -    | 0 | -   | -    | 0 | -    | -    | 0 | -    | -    |
| 2HMI           | 0 | -    | -    | 0 | -   | -    | 0 | -    | -    | 0 | -    | -    |
| 1F6M           | 0 | -    | -    | 0 | -   | -    | 0 | -    | -    | 0 | -    | -    |
| 1FQ1           | 0 | -    | -    | 0 | -   | -    | 0 | -    | -    | 0 | -    | -    |
| 1PXV           | 0 | -    | -    | 0 | -   | -    | 0 | -    | -    | 0 | -    | -    |
| 1ZLI           | 0 | -    | -    | 0 | -   | -    | 0 | -    | -    | 0 | -    | -    |
| 2O3B           | 0 | -    | -    | 0 | -   | -    | 0 | -    | -    | 0 | -    | -    |
| 1ATN           | 0 | -    | -    | 0 | -   | -    | 0 | -    | -    | 0 | -    | -    |
| 1BKD           | 0 | -    | -    | 0 | -   | -    | 0 | -    | -    | 0 | -    | -    |
| 1DE4           | 0 | -    | -    | 0 | -   | -    | 0 | -    | -    | 0 | -    | -    |
| 1EER           | 0 | -    | -    | 0 | -   | -    | 0 | -    | -    | 0 | -    | -    |
| 1FAK           | 0 | -    | -    | 0 | -   | -    | 0 | -    | -    | 0 | -    | -    |
| 1H1V           | 0 | -    | -    | 0 | -   | -    | 0 | -    | -    | 0 | -    | -    |
| 1IBR           | 0 | -    | -    | 0 | -   | -    | 0 | -    | -    | 0 | -    | -    |
| 1IRA           | 0 | -    | -    | 0 | -   | -    | 0 | -    | -    | 0 | -    | -    |
| 1JK9           | 0 | -    | -    | 0 | -   | -    | 0 | -    | -    | 0 | -    | -    |
| 1JMO           | 0 | -    | -    | 0 | -   | -    | 0 | -    | -    | 0 | -    | -    |
| 1JZD           | 3 | 2187 | 4.90 | 0 | -   | -    | 0 | -    | -    | 1 | 88   | 4.95 |
| 1R8S           | 0 | -    | -    | 0 | -   | -    | 0 | -    | -    | 0 | -    | -    |
| 1Y64           | 0 | -    | -    | 0 | -   | -    | 0 | -    | -    | 0 | -    | -    |
| 1ZM4           | 0 | -    | -    | 0 | -   | -    | 0 | -    | -    | 1 | 26   | 3.29 |
| 2C0L           | 0 | -    | -    | 0 | -   | -    | 0 | -    | -    | 0 | -    | -    |
| 2I9B           | 0 | -    | -    | 0 | -   | -    | 0 | -    | -    | 0 | -    | -    |
| 2IDO           | 0 | -    | -    | 0 | -   | -    | 0 | -    | -    | 0 | -    | -    |
| 2OT3           | 0 | -    | -    | 0 | -   | -    | 0 | -    | -    | 0 | -    | -    |

**Table S3. Divided dataset located to the Nucleus subcellular location.**

| PDBID  | UniprotID | Subcellular location                                 |
|--------|-----------|------------------------------------------------------|
| 1FQ1_r | P24941    | Cytoplasm, Nucleus, Cytoplasm, Endosome              |
| 1GXD_r | P08253    | Secreted, Membrane, Nucleus                          |
| 1H9D_r | Q03347    | Nucleus                                              |
| 1I2M_r | P62826    | Nucleus, Cytoplasm, Melanosome                       |
| 1IBR_r | P62825    | Nucleus, Cytoplasm, Melanosome                       |
| 1S1Q_r | Q99816    | Cytoplasm, Membrane, Nucleus, Late endosome membrane |
| 1SYX_r | P83876    | Nucleus                                              |
| 1ZHI_r | P54784    | Nucleus                                              |
| 2OZA_r | Q16539    | Cytoplasm, Nucleus                                   |
| 1ATN_l | P00639    | Secreted, Nucleus envelope                           |
| 1FQ1_l | Q16667    | Cytoplasm perinuclear region                         |
| 1H9D_l | Q08024    | Nucleus                                              |
| 1I2M_l | P18754    | Nucleus, Cytoplasm                                   |
| 1IBR_l | Q14974    | Cytoplasm, Nucleus envelope                          |
| 1S1Q_l | P0CG48    | Cytoplasm, Nucleus                                   |
| 1XD3_l | P0CG48    | Cytoplasm, Nucleus                                   |
| 1ZHI_l | P21691    | Nucleus, Chromosome                                  |
| 2AYO_l | P0CG48    | Cytoplasm, Nucleus                                   |
| 2OOB_l | P0CH28    | Cytoplasm, Nucleus                                   |
| 2OZA_l | P49137    | Cytoplasm, Nucleus                                   |

**Table S4. Divided dataset located to the Mitochondrion subcellular location.**

| PDBID  | UniprotID | Subcellular location                         |
|--------|-----------|----------------------------------------------|
| 1E6E_r | P08165    | Mitochondrion matrix                         |
| 1JK9_r | P40202    | Cytoplasm, Mitochondrion intermembrane space |
| 2PCC_r | P00431    | Mitochondrion matrix                         |
| 1E6E_l | P00257    | Mitochondrion matrix                         |
| 1JK9_l | P00445    | Cytoplasm, Mitochondrion intermembrane space |
| 2COL_l | O62742    | Cytoplasm, Mitochondrion, Peroxisome         |
| 2PCC_l | P00044    | Mitochondrion intermembrane space            |



**Table S5. Divided dataset located to the Golgi apparatus subcellular location.**

| PDBID  | UniprotID | Subcellular location                                                                                                             |
|--------|-----------|----------------------------------------------------------------------------------------------------------------------------------|
| 1HE8_r | P01112    | Cell membrane, Golgi apparatus, Golgi apparatus membrane                                                                         |
| 1R8S_r | P84077    | Golgi apparatus, Cytoplasm                                                                                                       |
| 1WQ1_r | P01112    | Cell membrane, Golgi apparatus, Golgi apparatus membrane                                                                         |
| 2AJF_r | Q9BYF1    | Processed angiotensin-converting enzyme, Secreted, Cell membrane                                                                 |
| 2CFH_r | O43617    | Golgi apparatus, Endoplasmic reticulum                                                                                           |
| 2G77_r | Q08484    | Golgi apparatus                                                                                                                  |
| 2OT3_r | Q9UL25    | Endoplasmic reticulum membrane, Golgi apparatus membrane, Early endosome membrane, Cytoplasmic vesicle membrane, Cleavage furrow |
| 1J2J_1 | Q9UJY5    | Golgi apparatus, Endosome membrane                                                                                               |
| 2AJF_1 | P59594    | Virion membrane, Host endoplasmic reticulum-Golgi intermediate compartment membrane, Host cell membrane                          |
| 2CFH_1 | Q86SZ2    | Golgi apparatus, Endoplasmic reticulum                                                                                           |
| 2G77_1 | O35963    | Golgi apparatus membrane                                                                                                         |

*Note:* “\_r” represents receptor protein and “\_l” represents ligand protein in PDBID column.

**Table S6: Chemotaxis dataset derived from PDB.**

| PDB ID            | Chain   | Organism              | Molecule | Domain                               |
|-------------------|---------|-----------------------|----------|--------------------------------------|
| 1FFG              | B,D     | <i>E. coli</i>        | CheA     | P2                                   |
| 1FFS              | B,D     | <i>E. coli</i>        | CheA     | P2                                   |
| 1FFW              | B,D     | <i>E. coli</i>        | CheA     | P2                                   |
| 1A0O              | A,C,E,G | <i>E. coli</i>        | CheY     |                                      |
| 1BDJ              | A       | <i>E. coli</i>        | CheY     |                                      |
| 1CHN              | A       | <i>E. coli</i>        | CheY     |                                      |
| 1F4V              | A,B,C   | <i>E. coli</i>        | CheY     |                                      |
| 1FFG              | A,C     | <i>E. coli</i>        | CheY     |                                      |
| 1FFS              | A,C     | <i>E. coli</i>        | CheY     |                                      |
| 1FFW              | A,C     | <i>E. coli</i>        | CheY     |                                      |
| 1FQW              | A,B     | <i>E. coli</i>        | CheY     |                                      |
| 1HEY              | A       | <i>E. coli</i>        | CheY     |                                      |
| 1JBE              | A       | <i>E. coli</i>        | CheY     |                                      |
| 1KMI              | Y       | <i>E. coli</i>        | CheY     |                                      |
| 1ZDM              | A,B     | <i>E. coli</i>        | CheY     |                                      |
| 2B1J              | A,B     | <i>E. coli</i>        | CheY     |                                      |
| 3CHY              | A       | <i>E. coli</i>        | CheY     |                                      |
| 1KMI <sup>†</sup> | Z       | <i>E. coli</i>        | CheZ     |                                      |
| 1QU7              | B       | <i>E. coli</i>        | MCP(Tsr) | Cytoplasmic domain                   |
| 1H5N              | A,B,C,D | <i>S. typhimurium</i> | CheA     | P1                                   |
| 1A2O              | A,B     | <i>S. typhimurium</i> | CheB     |                                      |
| 1CHD              | A       | <i>S. typhimurium</i> | CheB     | C-terminal catalytic domain          |
| 1AF7              | A       | <i>S. typhimurium</i> | CheR     |                                      |
| 1BC5              | A       | <i>S. typhimurium</i> | CheR     |                                      |
| 2CHE              | A       | <i>S. typhimurium</i> | CheY     |                                      |
| 2CHF              | A       | <i>S. typhimurium</i> | CheY     |                                      |
| 2FKA              | A       | <i>S. typhimurium</i> | CheY     |                                      |
| 2FLK              | A       | <i>S. typhimurium</i> | CheY     |                                      |
| 2FLW              | A       | <i>S. typhimurium</i> | CheY     |                                      |
| 2FMF              | A       | <i>S. typhimurium</i> | CheY     |                                      |
| 2FMH              | A       | <i>S. typhimurium</i> | CheY     |                                      |
| 2FMI              | A       | <i>S. typhimurium</i> | CheY     |                                      |
| 2FMK              | A       | <i>S. typhimurium</i> | CheY     |                                      |
| 2PL9              | A,B,C   | <i>S. typhimurium</i> | CheY     |                                      |
| 2PMC              | A,B,C,D | <i>S. typhimurium</i> | CheY     |                                      |
| 1TQG              | A       | <i>T. maritima</i>    | CheA     | P1                                   |
| 1U0S              | A       | <i>T. maritima</i>    | CheA     | P2                                   |
| 2CH4              | A,B     | <i>T. maritima</i>    | CheA     | P4, P5 (Residues 355–671)            |
| 1XKR              | A       | <i>T. maritima</i>    | CheC     |                                      |
| 2F9Z              | A,B     | <i>T. maritima</i>    | CheC     |                                      |
| 2F9Z              | C,D     | <i>T. maritima</i>    | CheD     |                                      |
| 2CH4              | W,Y     | <i>T. maritima</i>    | CheW     |                                      |
| 1SQU              | A,B     | <i>T. maritima</i>    | CheX     |                                      |
| 1XKO              | A,B     | <i>T. maritima</i>    | CheX     |                                      |
| 1TMY              | A       | <i>T. maritima</i>    | CheY     |                                      |
| 1U0S              | Y       | <i>T. maritima</i>    | CheY     |                                      |
| 2TMY              | A       | <i>T. maritima</i>    | CheY     |                                      |
| 3TMY              | A,B     | <i>T. maritima</i>    | CheY     |                                      |
| 4TMY              | A,B     | <i>T. maritima</i>    | CheY     |                                      |
| 1LKV              | X       | <i>T. maritima</i>    | FliG     | C-terminal domain (Residues 104–335) |
| 1QC7              | A,B     | <i>T. maritima</i>    | FliG     | C-terminal domain                    |
| 2HP7              | A       | <i>T. maritima</i>    | FliM     | CheC-like domain                     |
| 1O6A              | A,B     | <i>T. maritima</i>    | FliN     | C-terminal domain (Residues 59–154)  |
| 1YAB              | A,B     | <i>T. maritima</i>    | FliN     | Residues 68–154                      |
| 2CH7              | A,B     | <i>T. maritima</i>    | MCP      | Cytoplasmic domain                   |

*Note:* CheA comprises five domains: P1 (Histidine phosphotransfer domain), P2 (Response regulator binding domain), P3 (Histidine kinase-like homodimeric domain), P4 (Histidine kinase-like ATPases) and P5 (Receptor coupling domain). <sup>†</sup>Includes a mutation in residue 134 (Glu→Lys).

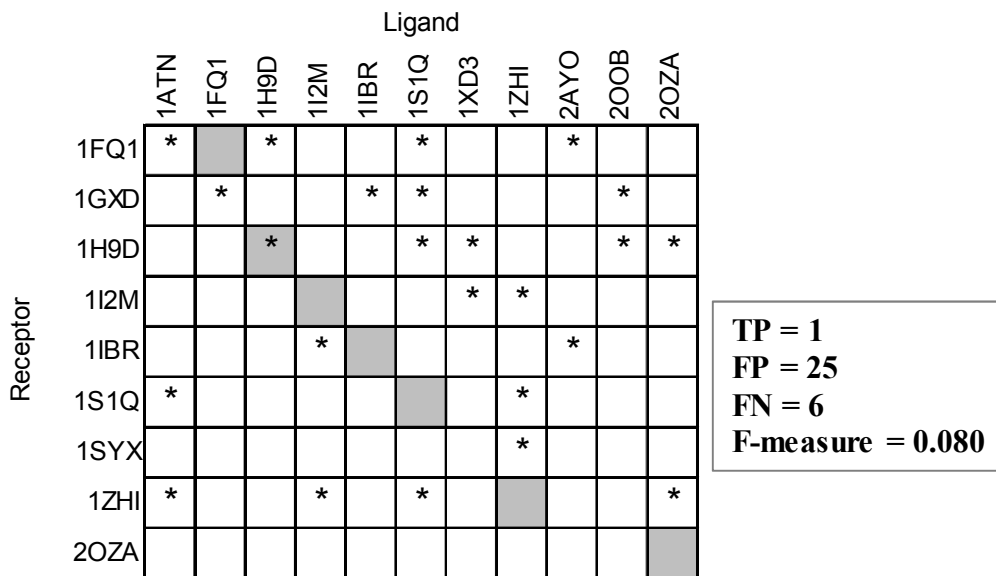

**Figure S1. Result of the PPI predictions with nucleus sub-dataset.** The interactions estimated as positive are marked with asterisks. The gray colored cells correspond to the known interactions.

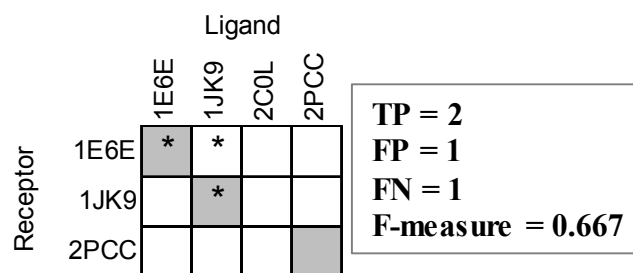

**Figure S2. Result of the PPI predictions with mitochondrion sub-dataset.** The interactions estimated as positive are marked with asterisks. The gray colored cells correspond to the known interactions.

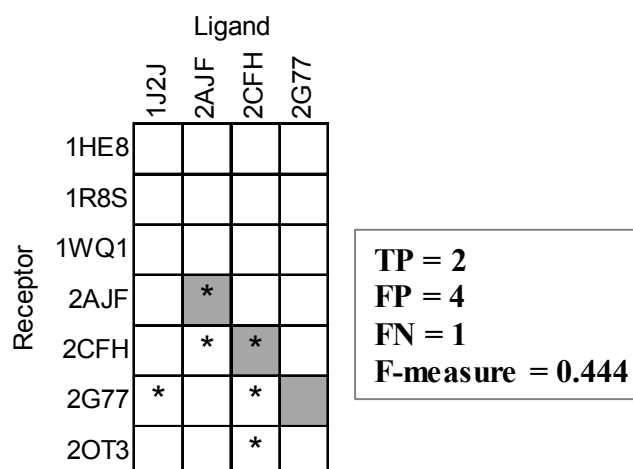

**Figure S3. Result of the PPI predictions with Golgi apparatus sub-dataset.** The interactions estimated as positive are marked with asterisks. The gray colored cells correspond to the known interactions.
